# Supplementary material for: Segregation effects on the properties of (AuAg)147
Source: Royal Society of Chemistry journal article supplement (doi:10.1039/c4cp00753k), 2014-04-15
Supplement: c4cp00753k1.pdf [file c4cp00753k1.pdf]

## Supporting Information for: Segregation Effects on the Properties of (AuAg)<sub>147</sub>

Cite this: DOI: 10.1039/x0xx00000x

A. L. Gould,<sup>\*,a</sup> C. J. Heard,<sup>b</sup> A. J. Logsdail<sup>\*,c</sup> and C. R. A. Catlow<sup>a,c</sup>

Received 00th January 2012,  
Accepted 00th January 2012

DOI: 10.1039/x0xx00000x

[www.rsc.org/](http://www.rsc.org/)

### 3.2 Chemical Ordering for Au<sub>n</sub>Ag<sub>147-n</sub> Nanoalloys

sub-vertex positions illustrates the tendency towards the formation of Ag@Au@Ag.

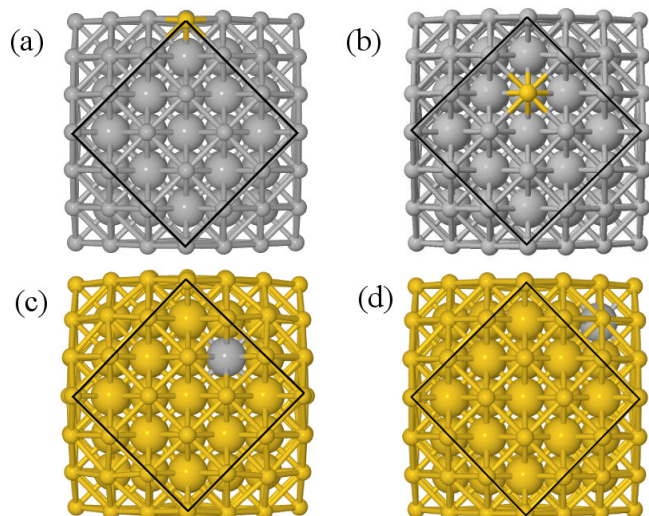

**Fig. 1.** Lowest energy arrangements for atomically doped structures: (a)  $E_{\min}^{\text{DFT}}(\text{Au}_1\text{Ag}_{146})$ ; (b)  $E_{\min-1}^{\text{DFT}}(\text{Au}_1\text{Ag}_{146})$ ; (c)  $E_{\min}^{\text{DFT}}(\text{Au}_{146}\text{Ag}_1)$ ; (d)  $E_{\min-1}^{\text{DFT}}(\text{Au}_{146}\text{Ag}_1)$ . The outer geometric shell, or surface layer, is represented as ball-and-stick to emphasize the positioning of the dopant atom, with the atomic radius of the sub-surface atoms increased to highlight their depth. Both (a) and (b) have Au in a surface position, whilst (c) and (d) show Ag subsurface. Au and Ag atoms are represented by yellow and grey spheres, respectively.

**Table I.** Change in  $E_b$  and  $E_{\text{exc}}$  for all systems (lowest energy alloy arrangements) investigated ( $\Delta E_{\text{exc}}$  and  $\Delta E_b$ , respectively) with values given relative to the structure with the lowest  $\Delta E_{\text{exc}}$  or  $\Delta E_b$ . [All cases given relative to the lowest value]. The Fermi Energy ( $E_F$ ) is given in the final column. All values are given in eV.

| Structure                           | $\Delta E_b^{\text{Gupta}}$ | $\Delta E_{\text{exc}}^{\text{Gupta}}$ | $\Delta E_b^{\text{DFT}}$ | $\Delta E_{\text{exc}}^{\text{DFT}}$ | $E_F$  |
|-------------------------------------|-----------------------------|----------------------------------------|---------------------------|--------------------------------------|--------|
| Ag <sub>147</sub>                   | 0.000                       | 12.959                                 | 0.000                     | 4.499                                | -3.996 |
| Au <sub>1</sub> Ag <sub>146</sub>   | 0.008                       | 12.549                                 | 0.004                     | 4.384                                | -4.013 |
| Au <sub>13</sub> Ag <sub>134</sub>  | 0.108                       | 7.864                                  | 0.052                     | 3.204                                | -4.067 |
| Au <sub>13</sub> @Ag <sub>134</sub> | 0.082                       | 11.738                                 | 0.051                     | 3.364                                | -3.964 |
| Au <sub>55</sub> Ag <sub>92</sub>   | 0.388                       | 1.150                                  | 0.200                     | 2.080                                | -4.227 |
| Au <sub>55</sub> @Ag <sub>92</sub>  | 0.372                       | 3.420                                  | 0.184                     | 4.470                                | -4.039 |
| Au <sub>74</sub> Ag <sub>73</sub>   | 0.500                       | 0.135                                  | 0.263                     | 2.212                                | -4.335 |
| Au <sub>92</sub> Ag <sub>55</sub>   | 0.602                       | 0.000                                  | 0.319                     | 2.746                                | -4.515 |
| Ag <sub>55</sub> @Au <sub>92</sub>  | 0.551                       | 7.379                                  | 0.338                     | 0.000                                | -4.802 |
| Au <sub>134</sub> Ag <sub>13</sub>  | 0.818                       | 2.561                                  | 0.437                     | 6.040                                | -4.808 |
| Ag <sub>13</sub> @Au <sub>134</sub> | 0.815                       | 2.971                                  | 0.436                     | 6.296                                | -4.873 |
| Au <sub>146</sub> Ag <sub>1</sub>   | 0.873                       | 4.190                                  | 0.466                     | 7.789                                | -4.839 |
| Au <sub>147</sub>                   | 0.879                       | 4.336                                  | 0.468                     | 7.956                                | -4.830 |

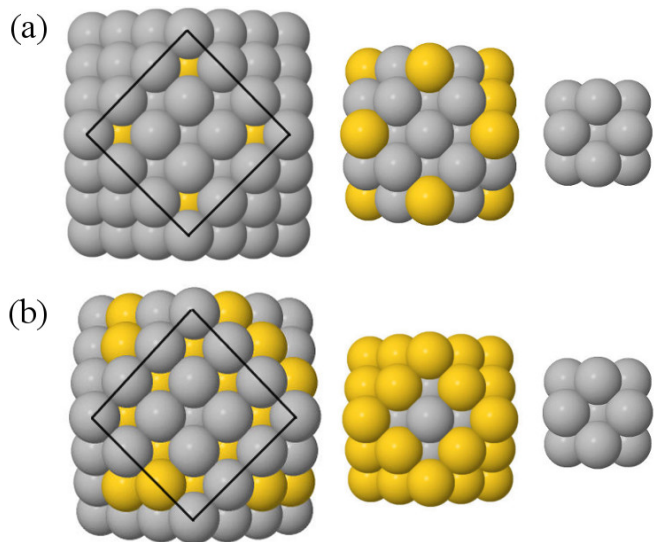

**Fig. 2.** Same structures as in Fig. 5. (a) and (b), removing the outermost subshell as one moves left to right: 147 atoms; 55 atoms; and 13 atoms for (a) Au<sub>13</sub>Ag<sub>134</sub> and (b) Au<sub>55</sub>Ag<sub>92</sub>. The propensity of Au to occupy

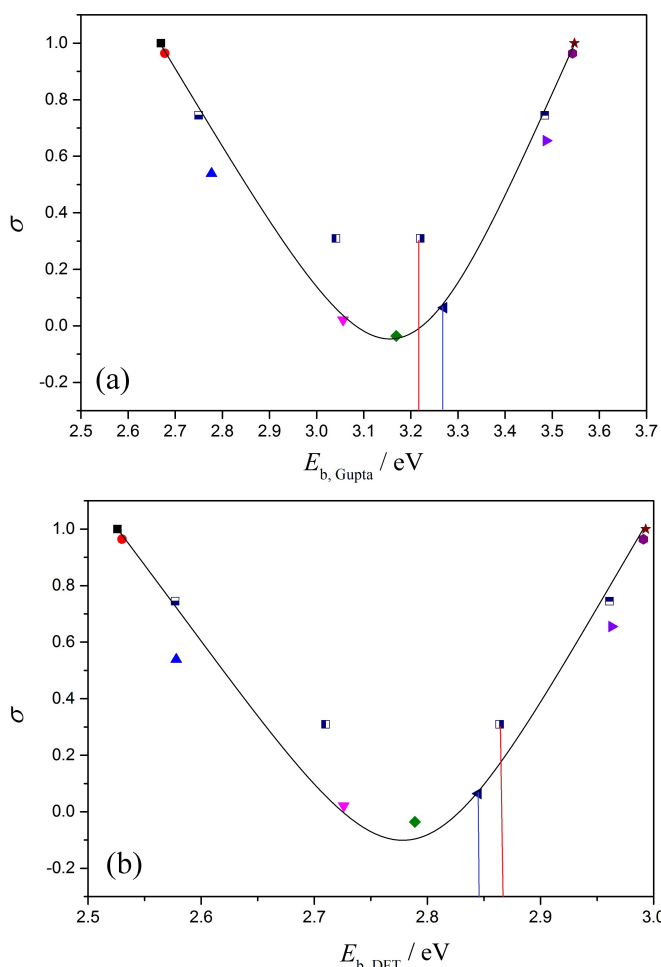

**Fig. 3.** (a)  $E_b^{\text{Gupta}}$  and (b)  $E_b^{\text{DFT}}$  against the extent of mixing within the nanocluster,  $\sigma$ . The line is only given as a guide to the eye; symbols are the same as in Fig. 5 of the main text. The red and blue lines are to emphasize the difference in  $E_b^{\text{Gupta}}$  and  $E_b^{\text{DFT}}$  between the alloy and its corresponding core@shell arrangement.

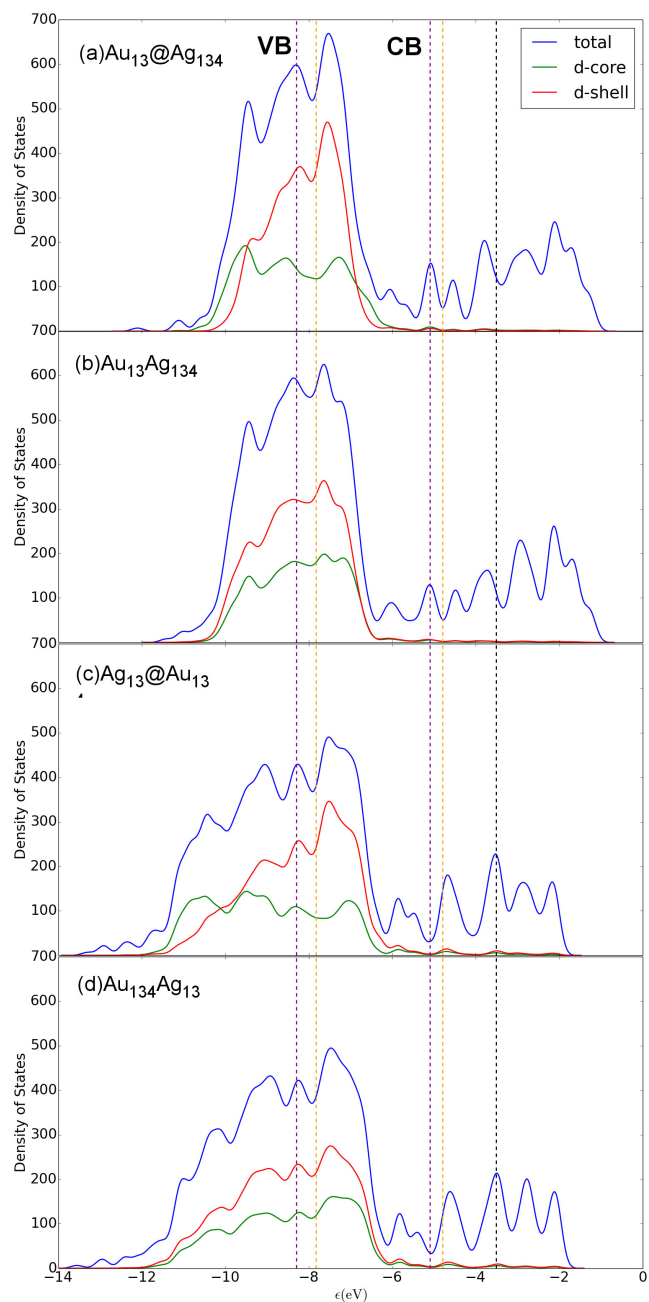

**Fig. 4.** DOS profiles for both alloys and core@shell compositions: (a)  $\text{Au}_{13}@Ag_{134}$ , (b)  $\text{Au}_{13}Ag_{134}$ , (c)  $Ag_{13}@Au_{13}$ , (d)  $\text{Au}_{134}Ag_{13}$ . A key is provided.  $E_F$  is given as a black dotted line, with the valence band maximum (VBM) and conduction band minimum (CBM), in purple and orange, for anatase and rutile  $\text{TiO}_2$ , respectively. A Gaussian broadening of 0.05 eV has been used for the electronic states.

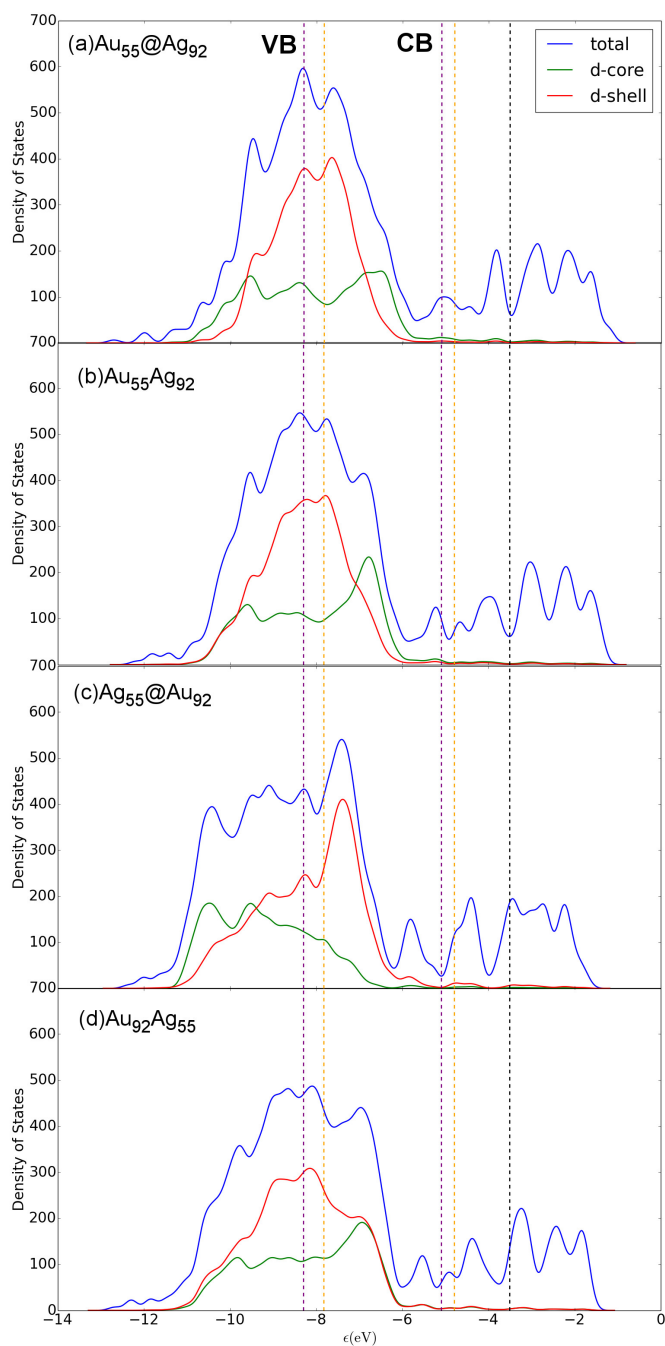

**Fig. 5.** DOS profiles for both alloys and core@shell compositions: (a)  $\text{Au}_{55}@\text{Ag}_{92}$ , (b)  $\text{Au}_{55}\text{Ag}_{92}$ , (c)  $\text{Ag}_{55}@\text{Au}_{92}$ , (d)  $\text{Au}_{92}\text{Ag}_{55}$ . A key is provided.  $E_{\text{F}}$  is given as a black dotted line, with the valence band maximum (VBM) and conduction band minimum (CBM), in purple and orange, for anatase and rutile  $\text{TiO}_2$ , respectively. A Gaussian broadening of 0.05 eV has been used for the electronic states.
